# Supplementary material for: Synthesis of a MnO2/Fe3O4/diatomite nanocomposite as an efficient heterogeneous Fenton-like catalyst for methylene blue degradation
Source: publisher site journal article supplement (doi:10.3762/bjnano.9.185), 2018-07-06
Supplement: Additional file 1 [file 2190-4286-9-185-S1.pdf]

## **Supporting Information**

for

### **Synthesis of a MnO<sub>2</sub>/Fe<sub>3</sub>O<sub>4</sub>/diatomite nanocomposite as an efficient heterogeneous Fenton-like catalyst for methylene blue degradation**

Zishun Li<sup>‡1,2</sup>, Xuekun Tang<sup>‡1,2</sup>, Kun Liu<sup>\*1,2</sup>, Jing Huang<sup>1,2</sup>, Yueyang Xu<sup>1</sup>, Qian Peng<sup>1,2</sup>

and Minlin Ao<sup>1,2</sup>

Address: <sup>1</sup>School of Minerals Processing and Bioengineering, Central South University, Changsha 410083, China and <sup>2</sup>Hunan Key Laboratory of Mineral Materials and Application, Central South University, Changsha 410083, China

Email: Kun Liu\* - [kliu@csu.edu.cn](mailto:kliu@csu.edu.cn)

\* Corresponding author

‡ Equal contributors

### **Additional experimental data**

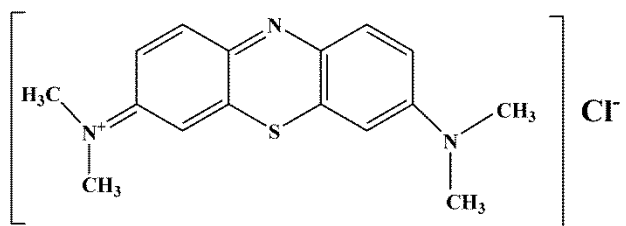

**Figure S1:** The chemical structure of methylene blue.

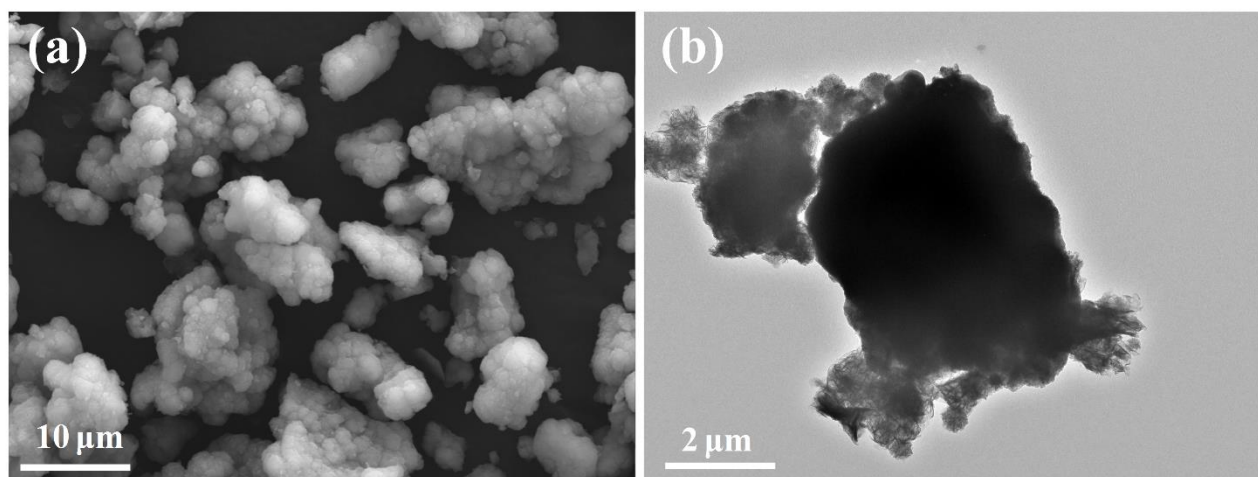

**Figure S2:** (a) SEM image and (b) TEM image of pure MnO<sub>2</sub> particles.
